# Supplementary material for: Scalable preparation of flexible heterogeneous graphene oxide structures for high-performance wet power generation
Source: Royal Society of Chemistry journal article supplement (doi:10.1039/d4ta01819b), 2024-01-01
Supplement: d4ta01819b1.pdf [file d4ta01819b1.pdf]

Electronic Supplementary Information (ESI)

**Scalable preparation of flexible heterogeneous graphene oxide structures for high performance wet power generation**

Yu Gao <sup>a,d</sup>, Xiaoming Cai <sup>b,c</sup>, Yuzhou Zhao <sup>a</sup>, Wentian Huang <sup>a,c</sup>, Jian Lv <sup>c</sup>, Jie Wang <sup>c</sup>, Huiming Liang <sup>c</sup>, Zhenliang Hao <sup>a,c</sup>, Hongling Tan <sup>a</sup>, Jinming Cai <sup>\*a,c,d</sup>

- a. Faculty of Materials Science and Engineering, Kunming University of Science and Technology, Kunming, Yunnan 650000, P. R. China
- b. Faculty of Mechanical and Electrical Engineering, Kunming University of Science and Technology, Kunming, Yunnan 650500, P. R. China
- c. Guangdong Morion Nanotechnology Co., Ltd, Dongguan 523069, Guangdong, P. R. China
- d. Southwest United Graduate School, Kunming, 650000, P. R. China

Correspondence to: [j.cai@kust.edu.cn](mailto:j.cai@kust.edu.cn)

## Supplementary Figures and Tables

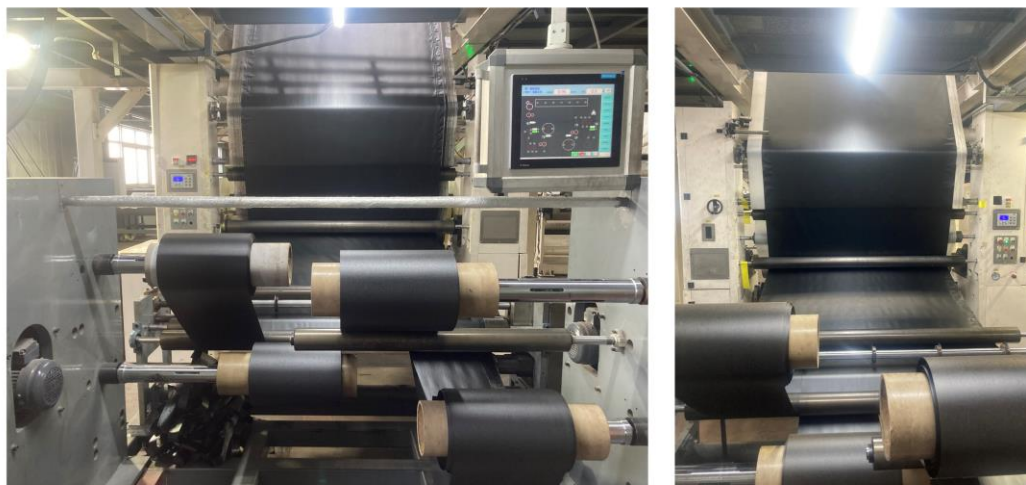

Fig. S1 Digital photos of industrialized coated preparation of graphene oxide films.

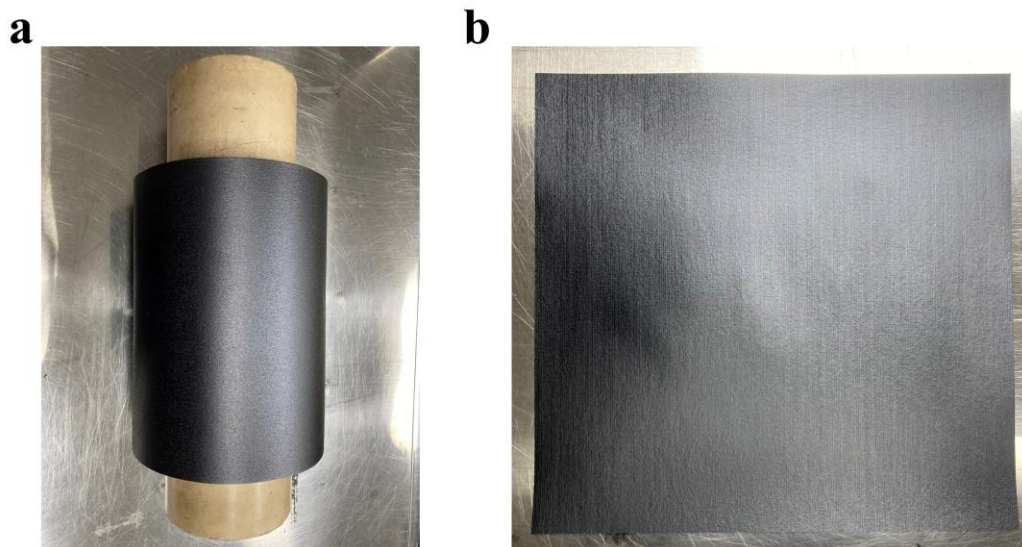

Fig. S2 Photos of (a) graphene oxide roll films. (b) cropped graphene oxide films.

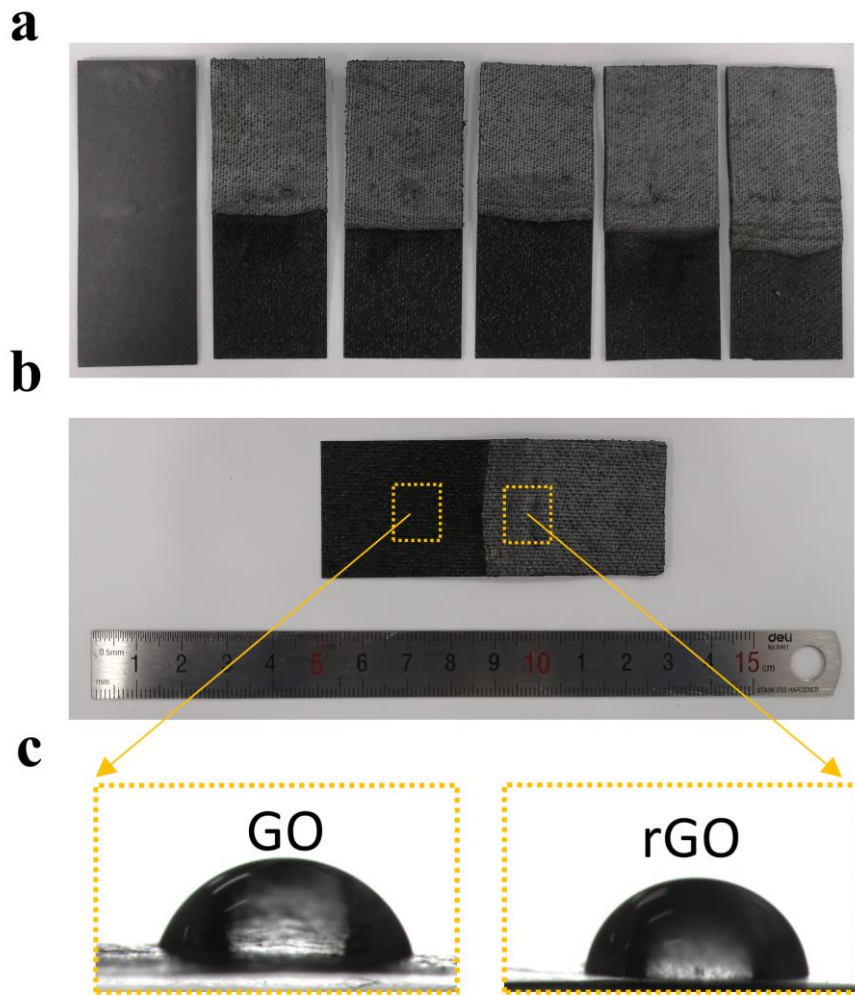

Fig. S3 (a,b) Images of HGOS prepared by thermal reduction. The color of the GO film is black, while the reduced rGO turns light gray. (c) Water contact angle of GO and rGO. The water contact angle increases when GO is reduced to rGO.

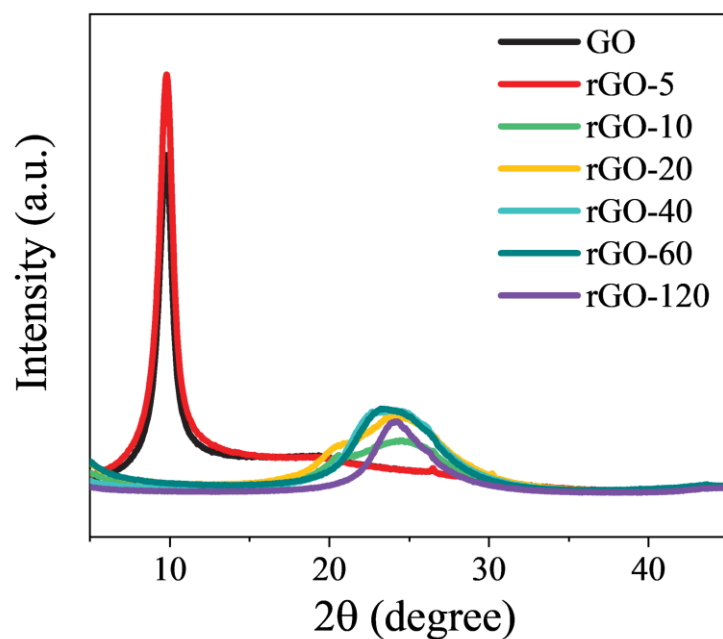

Fig. S4 XRD patterns of GO and rGO prepared with different thermal reduction time.

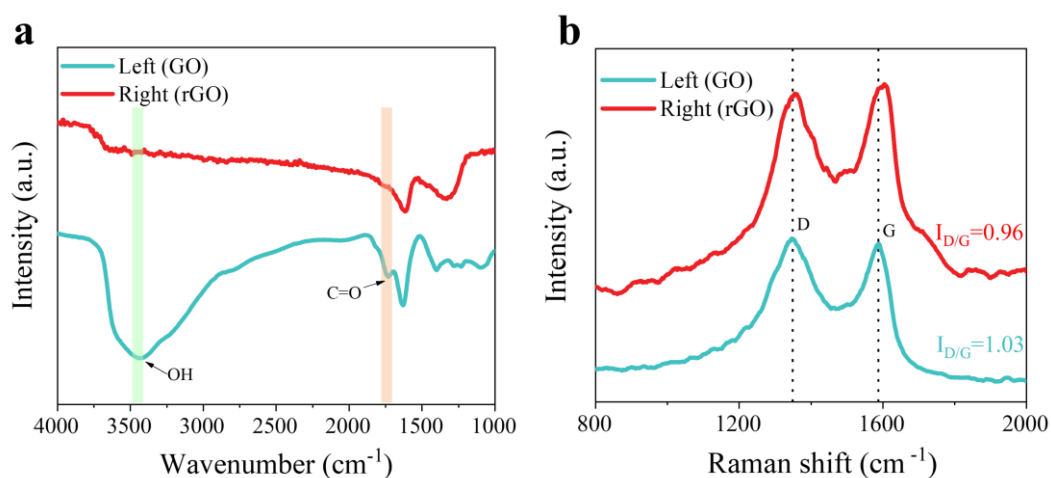

Fig. S5 (a) FTIR spectra of HGOS. (b) Raman spectra of HGOS.

Figure S5a shows the FTIR spectra of HGOS, blue colour corresponds to GO and red colour corresponds to rGO after thermal reduction. As can be seen from the figure, the intensity of the peaks of OH at  $3470\text{ cm}^{-1}$  and C=O at  $1735\text{ cm}^{-1}$  decreases after thermal reduction, suggesting that GO is reduced by the shedding of these groups during the thermal reduction process. Figure S5b shows the Raman spectra of HGOS, after thermal reduction, the D peak of GO decreases and  $I_{D/G}$  decreases from 1.03 to 0.96, indicating the reduction of GO to rGO.

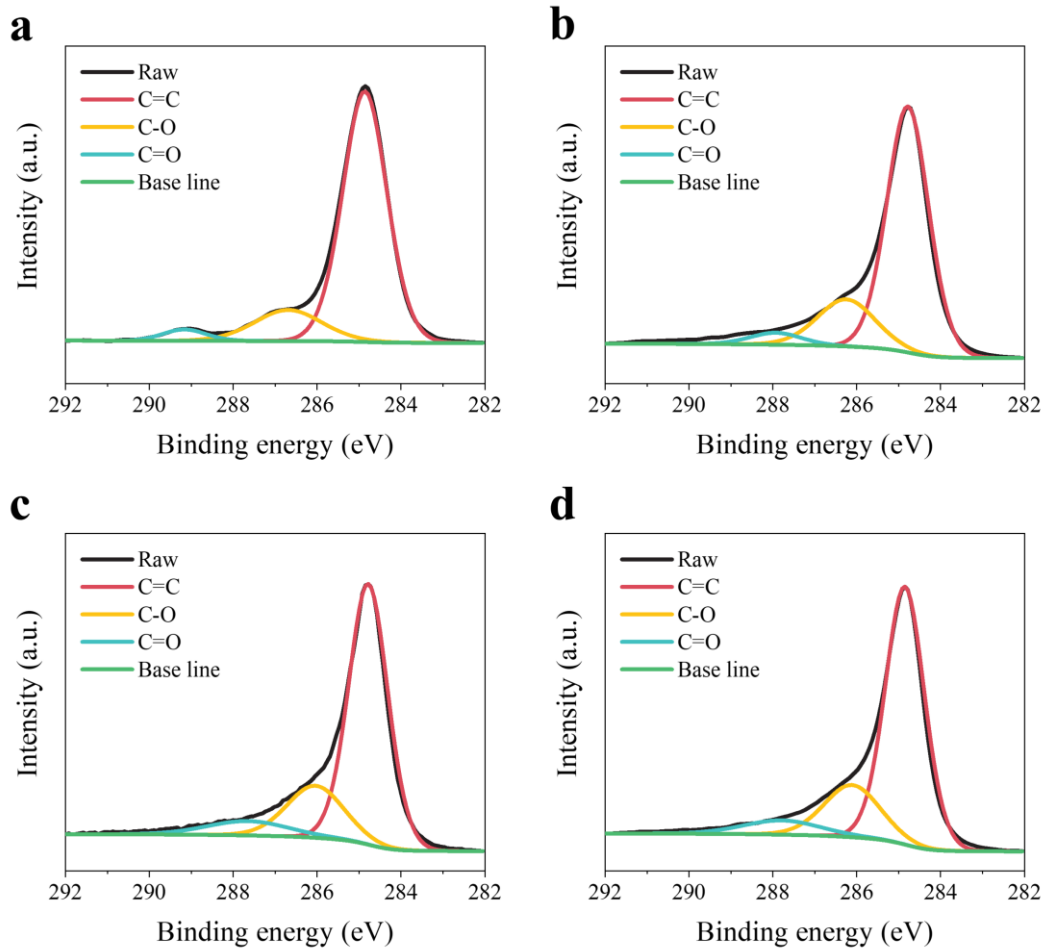

Fig. S6 C1s XPS spectra of (a) rGO-5, (b) rGO-10, (c) rGO-40, and (d) rGO-120.

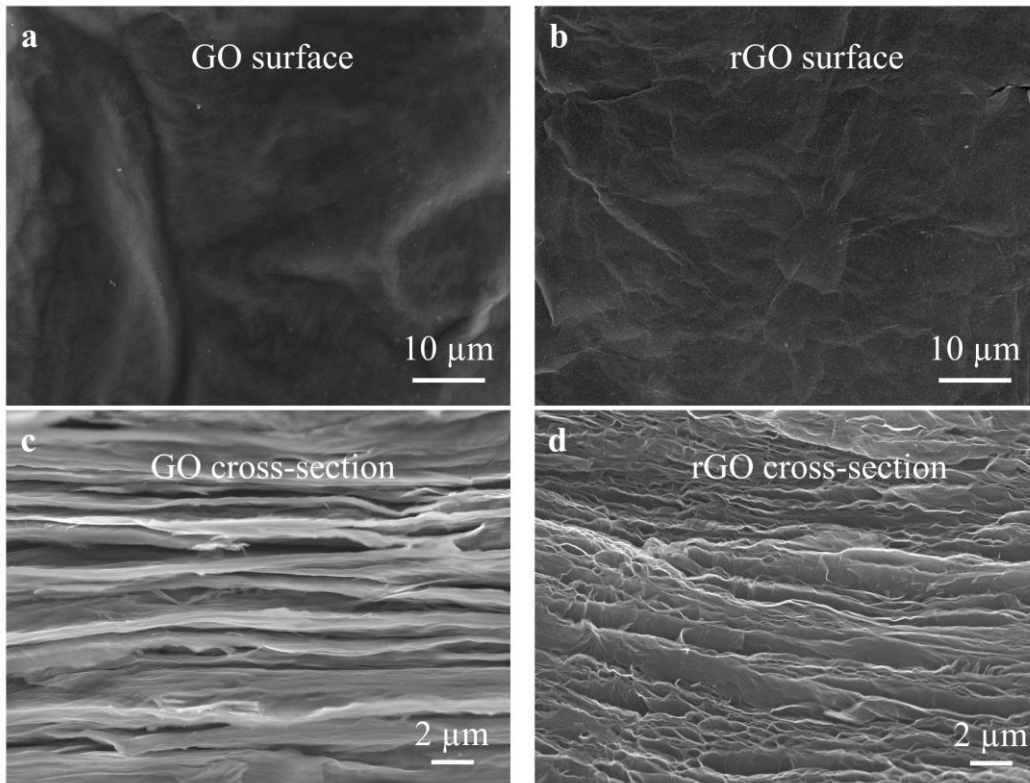

Fig. S7 SEM images of surface (a,b) and cross-section (c,d) of HGOS.

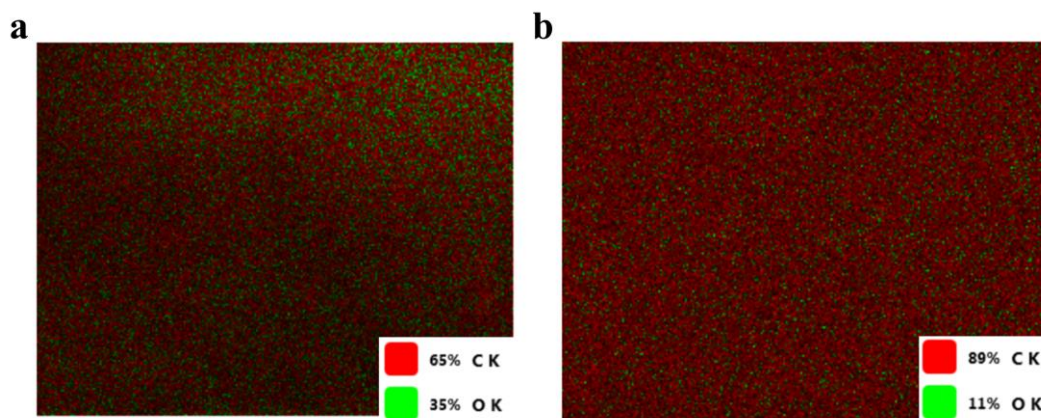

Fig. S8 EDS energy spectrum of the (a) left side (GO), and (b) right side (rGO) of HGOS.

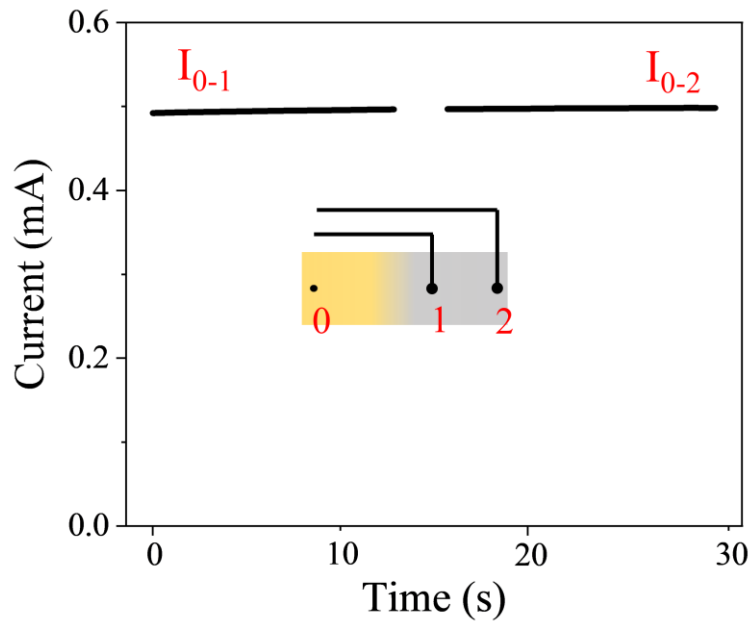

Fig. S9 Short circuit current between different electrodes on rGO.

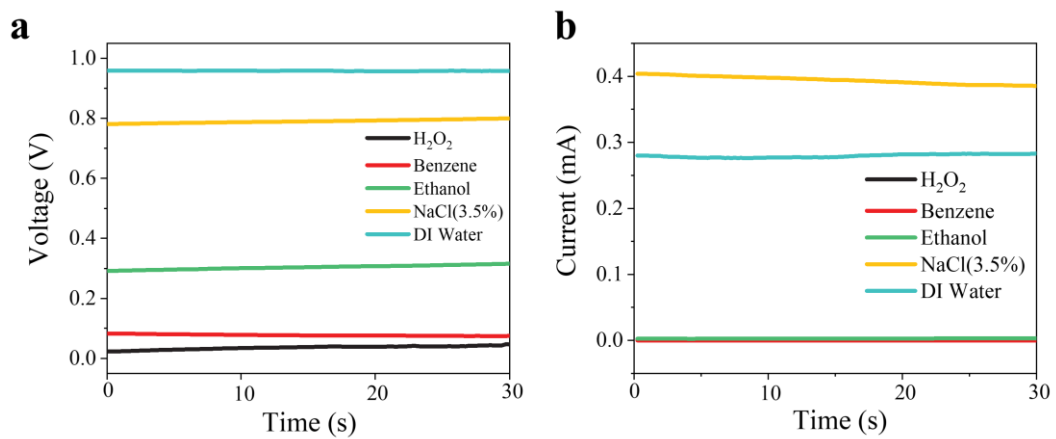

Fig. S10 (a)Voltage and (b)current of HGOS under different electrolytes.

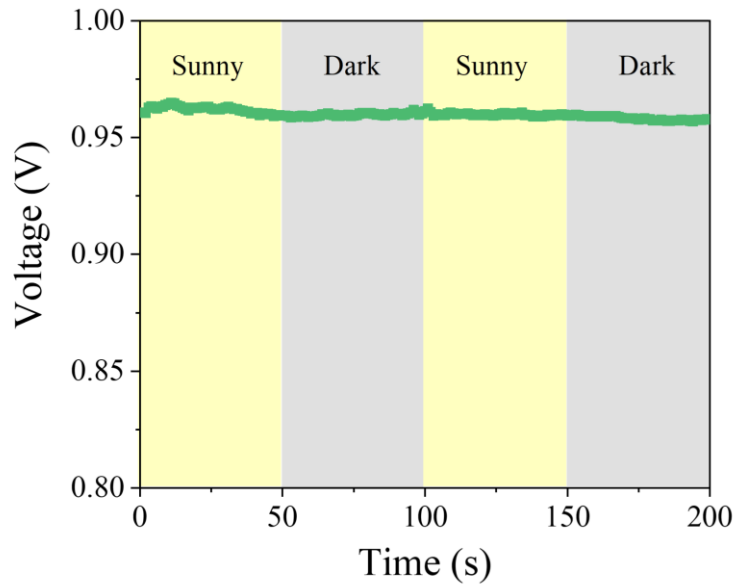

Fig. S11 Open-circuit voltage ( $V_{oc}$ ) of HGOS devices under sunny and dark ambient conditions with a relative humidity (RH) of about 75%.

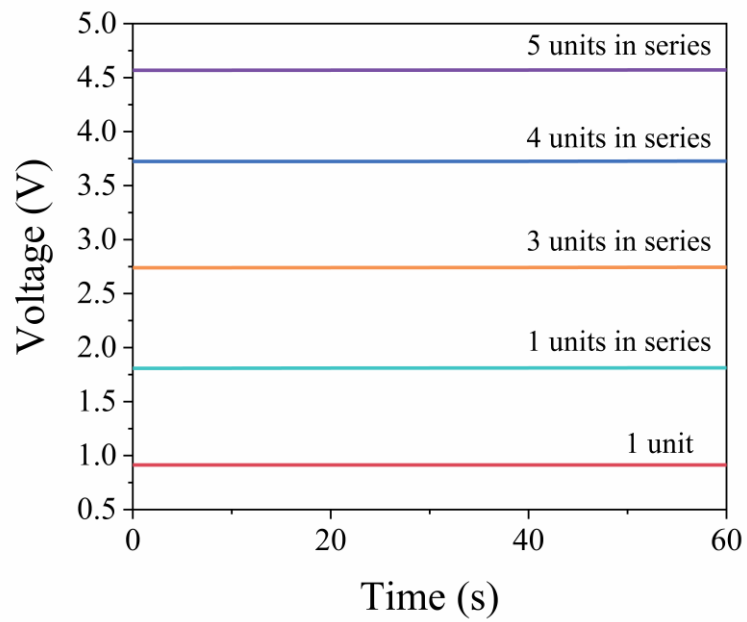

Fig. S12 The open circuit voltage of a series device.



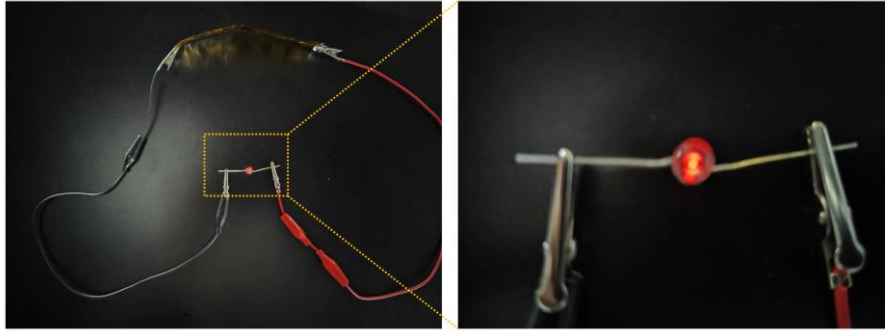

Fig. S13 Soft-packaged HGOS devices can power red LEDs.

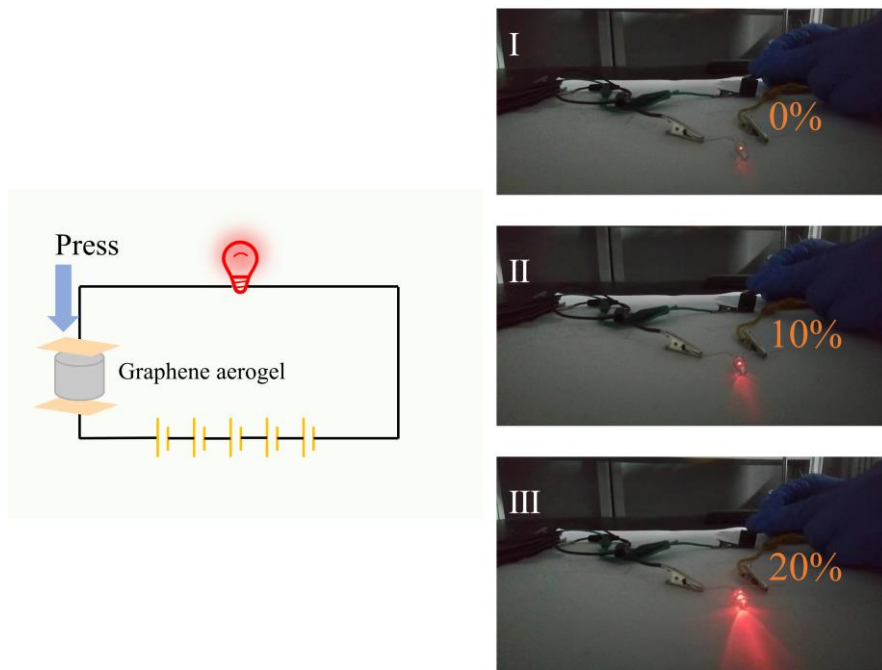

Fig. S14 The integrated HGOS device is connected in series with a graphene aerogel to control the brightness of the red LED by squeezing the aerogel to produce a change in resistance.

Table S1 Effect of thermal reduction time on oxygen content

| <b>Samples</b> | <b>heat treatment temperature (°C)</b> | <b>Heat treatment time (s)</b> | <b>O Atomic %</b> |
|----------------|----------------------------------------|--------------------------------|-------------------|
| rGO-5          | 450                                    | 5                              | 35.99             |
| rGO-10         | 450                                    | 10                             | 21.97             |
| rGO-40         | 450                                    | 40                             | 13.25             |
| rGO-120        | 450                                    | 120                            | 12.47             |

Table S2  $2\theta$  and  $d$  values of rGO prepared with different thermal reduction times. According to the Bragg equation  $2d\sin\theta = n\lambda$  ( $\lambda = 0.15406$  nm,  $n = 1$ ).

| <b>Samples</b> | <b><math>2\theta</math> (<math>^{\circ}</math>)</b> | <b><math>d</math> (nm)</b> |
|----------------|-----------------------------------------------------|----------------------------|
| GO             | 9.78                                                | 0.90                       |
| rGO-5          | 9.80                                                | 0.90                       |
| rGO-60         | 23.64                                               | 0.38                       |
| rGO-120        | 24.17                                               | 0.37                       |

Table S3 Summary of reported water-energy harvestings and performance comparisons

| <b>Material</b>                    | <b>V<sub>oc</sub></b> | <b>I<sub>sc</sub></b>          | <b>Water form</b>    | <b>Solution</b>  | <b>Ref.</b>                                                  |
|------------------------------------|-----------------------|--------------------------------|----------------------|------------------|--------------------------------------------------------------|
| CB sheet                           | ~1 V                  | ~150 nA                        | Water evaporation    | DI water         | Nat Nanotechnol.,2017 <sup>1</sup>                           |
| Porous GO sponges                  | ~0.63 V               | ~27.4 $\mu$ A                  | Water evaporation    | DI water         | Carbon,2019 <sup>2</sup>                                     |
| rGO film                           | ~1 V                  | ~10 $\mu$ A                    | Water evaporation    | NaCl             | ACS Appl. Mater. Interfaces,2021 <sup>3</sup>                |
| 3D wood                            | ~0.3 V                | ~10 $\mu$ A                    | Water evaporation    | DI water         | ACS Appl. Mater. Interfaces,2020 <sup>4</sup>                |
| TiO <sub>2</sub> nanoparticle film | ~0.2 V                | ~120 nA                        | Water evaporation    | DI water         | Journal of Materials Science & Technology, 2021 <sup>5</sup> |
| GO film                            | ~20 mV                | ~5 $\mu$ A cm <sup>-2</sup>    | Moisture             | $\Delta$ RH~30 % | Adv Mater, 2015 <sup>6</sup>                                 |
| GO framework                       | ~0.26 V               | ~3.2 mA cm <sup>-2</sup>       | Moisture             | $\Delta$ RH~75 % | Energy & Environmental Science, 2016 <sup>7</sup>            |
| Flexible GO film                   | ~0.2 V                | ~1.2 $\mu$ A                   | Moisture             | $\Delta$ RH~80 % | Adv Mater, 2019 <sup>8</sup>                                 |
| GO fiber                           | ~0.35 V               | ~1.06 mA cm <sup>-2</sup>      | Moisture             | $\Delta$ RH~65 % | Nano Energy, 2017 <sup>9</sup>                               |
| PSS/PVA film                       | ~0.6 V                | ~13.2 $\mu$ A cm <sup>-2</sup> | Moisture             | $\Delta$ RH~85 % | Nano Energy, 2020 <sup>10</sup>                              |
| Graphene/PET                       | <1 mV                 | <1 $\mu$ A                     | Water droplet        | NaCl             | Nat Nanotechnol.,2014 <sup>11</sup>                          |
| Graphene/PET                       | ~0.5 V                | ~25 $\mu$ A                    | Water droplet        | NaCl             | J Am Chem Soc, 2018 <sup>12</sup>                            |
| PTFE                               | ~4 V                  | ~0.5 $\mu$ A                   | Water droplet        | Water            | Nat commun, 2013 <sup>13</sup>                               |
| PTFE                               | ~150 V                | ~250 $\mu$ A                   | Water droplet        | Water            | Nature, 2020 <sup>14</sup>                                   |
| <b>GO-rGO</b>                      | <b>~1 V</b>           | <b>~490 <math>\mu</math>A</b>  | <b>Water contact</b> | <b>DI Water</b>  | <b>This work</b>                                             |

## Reference

- S1. G. Xue, Y. Xu, T. Ding, J. Li, J. Yin, W. Fei, Y. Cao, J. Yu, L. Yuan, L. Gong, J. Chen, S. Deng, J. Zhou and W. Guo, *Nat Nanotechnol*, 2017, **12**, 317-321.
- S2. G. Zhang, Z. Duan, X. Qi, Y. Xu, L. Li, W. Ma, H. Zhang, C. Liu and W. Yao, *Carbon*, 2019, **148**, 1-8.
- S3. M. Wu, M. Peng, Z. Liang, Y. Liu, B. Zhao, D. Li, Y. Wang, J. Zhang, Y. Sun and L. Jiang, *ACS Appl Mater Interfaces*, 2021, **13**, 26989-26997.
- S4. X. Zhou, W. Zhang, C. Zhang, Y. Tan, J. Guo, Z. Sun and X. Deng, *ACS Appl Mater Interfaces*, 2020, **12**, 11232-11239.
- S5. T. Zhong, H. Li, T. Zhao, H. Guan, L. Xing and X. Xue, *Journal of Materials Science & Technology*, 2021, **76**, 33-40.
- S6. F. Zhao, H. Cheng, Z. Zhang, L. Jiang and L. Qu, *Adv Mater*, 2015, **27**, 4351-4357.
- S7. F. Zhao, Y. Liang, H. Cheng, L. Jiang and L. Qu, *Energy & Environmental Science*, 2016, **9**, 912-916.
- S8. C. Yang, Y. Huang, H. Cheng, L. Jiang and L. Qu, *Adv Mater*, 2019, **31**, e1805705.
- S9. Y. Liang, F. Zhao, Z. Cheng, Q. Zhou, H. Shao, L. Jiang and L. Qu, *Nano Energy*, 2017, **32**, 329-335.
- S10. H. Wang, H. Cheng, Y. Huang, C. Yang, D. Wang, C. Li and L. Qu, *Nano Energy*, 2020, **67**.
- S11. J. Yin, X. Li, J. Yu, Z. Zhang, J. Zhou and W. Guo, *Nat Nanotechnol*, 2014, **9**, 378-383.
- S12. S. Yang, Y. Su, Y. Xu, Q. Wu, Y. Zhang, M. B. Raschke, M. Ren, Y. Chen, J. Wang, W. Guo, Y. Ron Shen and C. Tian, *J Am Chem Soc*, 2018, **140**, 13746-13752.
- S13. J. K. Moon, J. Jeong, D. Lee and H. K. Pak, *Nat Commun*, 2013, **4**, 1487.
- S14. W. Xu, H. Zheng, Y. Liu, X. Zhou, C. Zhang, Y. Song, X. Deng, M. Leung, Z. Yang, R. X. Xu, Z. L. Wang, X. C. Zeng and Z. Wang, *Nature*, 2020, **578**, 392-396.
